# Supplementary material
Source: publisher site journal article supplement (http://kjim.org/upload/media/kjim-2023-206-Supplementary-8.pdf)
Supplement: Supplementary file 1 [file kjim-2023-206-Supplementary-8.pdf]

## 8. Evidence table

|            |                                                                                                                                        |
|------------|----------------------------------------------------------------------------------------------------------------------------------------|
| <b>KQ1</b> | <i>Should we use NSAIDs over colchicine/corticosteroids in patients experiencing a gout flare to reduce the duration of the flare?</i> |
|------------|----------------------------------------------------------------------------------------------------------------------------------------|

### 1) Characteristics of selected studies (Evidence table)

| Study      | Design            | Characteristics     | Intervention | Control    | Outcome                   |
|------------|-------------------|---------------------|--------------|------------|---------------------------|
| Billy 2017 | Systematic Review | Acute gout patients | NSAIDs       | Steroid    | Pain, Acute gout duration |
| Roddy2019  | RCT               | Acute gout patients | NSAIDs       | Colchicine | Pain, Acute gout duration |

### 2) Assessment of risk of bias

Billy (Amstar: 8)

| Questions                                                                               | Assessment |    |              |                |
|-----------------------------------------------------------------------------------------|------------|----|--------------|----------------|
|                                                                                         | Yes        | No | Can't answer | Not applicable |
| 1. Was an 'a priori' design provided?                                                   |            |    | o            |                |
| 2. Was there duplicate study selection and data extraction?                             | o          |    |              |                |
| 3. Was a comprehensive literature search performed?                                     | o          |    |              |                |
| 4. Was the status of publication (i.e. grey literature) used as an inclusion criterion? | o          |    |              |                |

|                                                                                                      |   |   |  |  |
|------------------------------------------------------------------------------------------------------|---|---|--|--|
| 5. Was a list of studies (included and excluded) provided?                                           |   | 0 |  |  |
| 6. Were the characteristics of the included studies provided?                                        | 0 |   |  |  |
| 7. Was the scientific quality of the included studies assessed and documented?                       | 0 |   |  |  |
| 8. Was the scientific quality of the included studies used appropriately in formulating conclusions? | 0 |   |  |  |
| 9. Were the methods used to combine the findings of studies appropriate?                             | 0 |   |  |  |
| 10. Was the likelihood of publication bias assessed?                                                 | 0 |   |  |  |
| 11. Was the conflict of interest stated?                                                             |   | 0 |  |  |

|                     |                                                                                   |                                                           |
|---------------------|-----------------------------------------------------------------------------------|-----------------------------------------------------------|
| Roddy et al. (2020) |  | Random sequence generation (selection bias)               |
|                     |  | Allocation concealment (selection bias)                   |
|                     |  | Blinding of participants and personnel (performance bias) |
|                     |  | Blinding of outcome assessment (detection bias)           |
|                     |                                                                                   | Incomplete outcome data (attrition bias)                  |
|                     |  | Selective reporting (reporting bias)                      |
|                     |                                                                                   | Other bias                                                |

### 3) GRADE evidence profile

| Certainty assessment      |              |              |               |              |             |                      | N <sup>o</sup> of patients |         | Effect            |                   | Certainty | Importance |
|---------------------------|--------------|--------------|---------------|--------------|-------------|----------------------|----------------------------|---------|-------------------|-------------------|-----------|------------|
| N <sup>o</sup> of studies | Study design | Risk of bias | Inconsistency | Indirectness | Imprecision | Other considerations | NSAIDs                     | steroid | Relative (95% CI) | Absolute (95% CI) |           |            |

#### Pain

|   |                   |             |             |         |             |      |     |     |   |                                                     |                  |           |
|---|-------------------|-------------|-------------|---------|-------------|------|-----|-----|---|-----------------------------------------------------|------------------|-----------|
| 2 | randomised trials | not serious | not serious | serious | not serious | none | 267 | 267 | - | SMD 0.09<br>SD lower<br>(0.26 lower to 0.08 higher) | ⊕⊕⊕○<br>MODERATE | IMPORTANT |
|---|-------------------|-------------|-------------|---------|-------------|------|-----|-----|---|-----------------------------------------------------|------------------|-----------|

#### Duration of flare

|   |                   |         |             |             |         |      |      |      |               |  |             |          |
|---|-------------------|---------|-------------|-------------|---------|------|------|------|---------------|--|-------------|----------|
| 1 | randomised trials | serious | not serious | not serious | serious | none | -/10 | -/10 | not estimable |  | ⊕⊕○○<br>LOW | critical |
|---|-------------------|---------|-------------|-------------|---------|------|------|------|---------------|--|-------------|----------|

CI: Confidence interval; SMD: Standardised mean difference

### Explanations

- a. short-term pain (7 days)
- b. Time to disease resolution

| Certainty assessment |              |              |               |              |             |                      | № of patients |            | Effect            |                   | Certainty | Importance |
|----------------------|--------------|--------------|---------------|--------------|-------------|----------------------|---------------|------------|-------------------|-------------------|-----------|------------|
| № of studies         | Study design | Risk of bias | Inconsistency | Indirectness | Imprecision | Other considerations | NSAID         | colchicine | Relative (95% CI) | Absolute (95% CI) |           |            |

**Pain<sup>a</sup>**

|   |                   |                      |             |             |             |      |     |     |   |               |                  |           |
|---|-------------------|----------------------|-------------|-------------|-------------|------|-----|-----|---|---------------|------------------|-----------|
| 1 | randomised trials | serious <sup>b</sup> | not serious | not serious | not serious | none | 200 | 199 | - | not estimable | ⊕⊕⊕○<br>MODERATE | IMPORTANT |
|---|-------------------|----------------------|-------------|-------------|-------------|------|-----|-----|---|---------------|------------------|-----------|

**Duration (follow up: median 28 days)<sup>c</sup>**

|   |                   |                      |             |             |             |      |     |     |   |                              |                  |          |
|---|-------------------|----------------------|-------------|-------------|-------------|------|-----|-----|---|------------------------------|------------------|----------|
| 1 | randomised trials | serious <sup>b</sup> | not serious | not serious | not serious | none | 200 | 199 | - | median 1 days lower (0 to 0) | ⊕⊕⊕○<br>MODERATE | CRITICAL |
|---|-------------------|----------------------|-------------|-------------|-------------|------|-----|-----|---|------------------------------|------------------|----------|

CI: Confidence interval

## Explanations

a. mean change in worst pain intensity over days 1–7

b. This is an open label study without blinded outcome assessment or placebo tablets, and collection of solely self-reported outcomes.

c. Days to complete pain resolution

**KQ2***Should we start ULT during a gout flare vs. after a gout flare has resolved when initiating ULT?***1) Characteristics of selected studies (Evidence table)**

| Study      | Design            | Characteristics                                   | Intervention | Control | Outcome                                                   |
|------------|-------------------|---------------------------------------------------|--------------|---------|-----------------------------------------------------------|
| Fatma 2016 | Systematic Review | Initiation of any ULT in patients with acute gout | Allopurinol  | Placebo | Gout attack<br>:Pain severity and Duration of gout attack |

**2) Assessment of risk of bias**

AMSTAR: 8

| Questions                                                                               | Assessment |    |              |                |
|-----------------------------------------------------------------------------------------|------------|----|--------------|----------------|
|                                                                                         | Yes        | No | Can't answer | Not applicable |
| 1. Was an 'a priori' design provided?                                                   |            |    | o            |                |
| 2. Was there duplicate study selection and data extraction?                             | o          |    |              |                |
| 3. Was a comprehensive literature search performed?                                     | o          |    |              |                |
| 4. Was the status of publication (i.e. grey literature) used as an inclusion criterion? | o          |    |              |                |
| 5. Was a list of studies (included and excluded) provided?                              |            | o  |              |                |
| 6. Were the characteristics of the included studies provided?                           | o          |    |              |                |
| 7. Was the scientific quality of the included studies assessed and documented?          | o          |    |              |                |
| 8. Was the scientific quality of the included studies used appropriately in             | o          |    |              |                |

|                                                                          |   |   |  |  |
|--------------------------------------------------------------------------|---|---|--|--|
| formulating conclusions?                                                 |   |   |  |  |
| 9. Were the methods used to combine the findings of studies appropriate? | o |   |  |  |
| 10. Was the likelihood of publication bias assessed?                     | o |   |  |  |
| 11. Was the conflict of interest stated?                                 |   | o |  |  |

### 3) GRADE evidence profile

| Certainty assessment      |              |              |               |              |             |                      | N <sup>o</sup> of patients           |                                      | Effect            |                   | Certainty | Importance |
|---------------------------|--------------|--------------|---------------|--------------|-------------|----------------------|--------------------------------------|--------------------------------------|-------------------|-------------------|-----------|------------|
| N <sup>o</sup> of studies | Study design | Risk of bias | Inconsistency | Indirectness | Imprecision | Other considerations | With ULT be used during a gout flare | With after a gout flare has resolved | Relative (95% CI) | Absolute (95% CI) |           |            |

#### Gout flares

|   |                   |             |             |             |                             |      |             |              |               |  |             |  |
|---|-------------------|-------------|-------------|-------------|-----------------------------|------|-------------|--------------|---------------|--|-------------|--|
| 2 | randomized trials | not serious | not serious | not serious | very serious <sub>a,b</sub> | none | 5/53 (9.4%) | 8/49 (16.3%) | not estimable |  | ⊕⊕○○<br>LOW |  |
|---|-------------------|-------------|-------------|-------------|-----------------------------|------|-------------|--------------|---------------|--|-------------|--|

#### Duration of gout attack

|   |                   |                      |             |             |                             |      |    |    |               |  |                  |  |
|---|-------------------|----------------------|-------------|-------------|-----------------------------|------|----|----|---------------|--|------------------|--|
| 1 | randomized trials | serious <sup>c</sup> | not serious | not serious | very serious <sub>a,b</sub> | none | 14 | 17 | not estimable |  | ⊕○○○<br>VERY LOW |  |
|---|-------------------|----------------------|-------------|-------------|-----------------------------|------|----|----|---------------|--|------------------|--|

#### Pain

|   |                   |                      |             |             |                      |      |    |    |               |  |             |  |
|---|-------------------|----------------------|-------------|-------------|----------------------|------|----|----|---------------|--|-------------|--|
| 2 | randomized trials | serious <sup>c</sup> | not serious | not serious | serious <sup>a</sup> | none | 41 | 45 | not estimable |  | ⊕⊕○○<br>LOW |  |
|---|-------------------|----------------------|-------------|-------------|----------------------|------|----|----|---------------|--|-------------|--|

CI: Confidence interval

## Explanations

- a. wide confidence intervals
- b. small sample sizes in each arm
- c. RCT with two domains with high RoB

|                   |                                                                                          |
|-------------------|------------------------------------------------------------------------------------------|
| <b><u>KQ3</u></b> | <i>Should prophylaxis vs. no prophylaxis be used in patients with gout starting ULT?</i> |
|-------------------|------------------------------------------------------------------------------------------|

### 1) Characteristics of selected studies (Evidence table)

| Study         | Design                    | Characteristics | Intervention                    | Control                               | Outcome    |
|---------------|---------------------------|-----------------|---------------------------------|---------------------------------------|------------|
| Paulus 1974   | Placebo controlled trial  | Gout            | Prophylactic colchicine therapy | placebo                               | Gout flare |
| Borstad 2004  | Randomised clinical trial | Gout            | Prophylactic colchicine therapy | none                                  | Gout flare |
| Yamanaka 2018 | Randomised clinical trial | Gout            | Prophylactic colchicine therapy | Step wise increase<br>febuxostat dose | Gout flare |



## 2) Assessment of risk of bias

|                        | Random sequence generation (selection bias) | Allocation concealment (selection bias) | Blinding of participants and personnel (performance bias) | Blinding of outcome assessment (detection bias) | Incomplete outcome data (attrition bias) | Selective reporting (reporting bias) | Other bias |
|------------------------|---------------------------------------------|-----------------------------------------|-----------------------------------------------------------|-------------------------------------------------|------------------------------------------|--------------------------------------|------------|
| Borstad et al. (2012)  | +                                           |                                         | +                                                         |                                                 | +                                        | -                                    | +          |
| Paulus et al. (1974)   | -                                           |                                         | +                                                         | +                                               | -                                        | +                                    |            |
| Yamanaka et al. (2018) | +                                           | +                                       | -                                                         | -                                               | +                                        | +                                    |            |

### 3) GRADE evidence profile

| Certainty assessment      |              |              |               |              |             |                      | N <sup>o</sup> of patients |              | Effect            |                   | Certainty | Importance |
|---------------------------|--------------|--------------|---------------|--------------|-------------|----------------------|----------------------------|--------------|-------------------|-------------------|-----------|------------|
| N <sup>o</sup> of studies | Study design | Risk of bias | Inconsistency | Indirectness | Imprecision | Other considerations | [intervention]             | [comparison] | Relative (95% CI) | Absolute (95% CI) |           |            |

#### Gout flare

|   |                   |             |             |             |              |      |                   |                   |               |  |                  |  |
|---|-------------------|-------------|-------------|-------------|--------------|------|-------------------|-------------------|---------------|--|------------------|--|
| 3 | randomised trials | not serious | not serious | not serious | serious<br>⇨ | none | 48/143<br>(33.6%) | 90/193<br>(46.6%) | not estimable |  | ⊕⊕⊕○<br>MODERATE |  |
|---|-------------------|-------------|-------------|-------------|--------------|------|-------------------|-------------------|---------------|--|------------------|--|

CI: Confidence interval

|                   |                                                                                                                                          |
|-------------------|------------------------------------------------------------------------------------------------------------------------------------------|
| <b><u>KQ4</u></b> | <i>Should prescribing ULT to achieve serum urate &lt;6mg/dL be used in gout on ULT in order to prevent gout flares and bone erosion?</i> |
|-------------------|------------------------------------------------------------------------------------------------------------------------------------------|

#### 1) Characteristics of selected studies (Evidence table)

| Study         | Design                    | Characteristics                                      | Intervention                                                       | Control | Outcome          |
|---------------|---------------------------|------------------------------------------------------|--------------------------------------------------------------------|---------|------------------|
| Shiozawa 2017 | Systematic Review         | Individuals with preexisting gout                    | SUA levels at baseline<br>Stratified by urate-lowering therapy use | none    | Gout flare       |
| Dalbeth 2019  | Randomised clinical trial | Gout patients with serum uric acid level over 6mg/dL | Dose escalation with serum uric acid target below 6                | none    | CT erosion score |

## 2) Assessment of risk of bias

Shiozawa AMSTAR: 5

| Questions                                                                                            | Assessment |    |              |                |
|------------------------------------------------------------------------------------------------------|------------|----|--------------|----------------|
|                                                                                                      | Yes        | No | Can't answer | Not applicable |
| 1. Was an 'a priori' design provided?                                                                |            |    | o            |                |
| 2. Was there duplicate study selection and data extraction?                                          | o          |    |              |                |
| 3. Was a comprehensive literature search performed?                                                  | o          |    |              |                |
| 4. Was the status of publication (i.e. grey literature) used as an inclusion criterion?              | o          |    |              |                |
| 5. Was a list of studies (included and excluded) provided?                                           | o          |    |              |                |
| 6. Were the characteristics of the included studies provided?                                        | o          |    |              |                |
| 7. Was the scientific quality of the included studies assessed and documented?                       |            | o  |              |                |
| 8. Was the scientific quality of the included studies used appropriately in formulating conclusions? |            | o  |              |                |
| 9. Were the methods used to combine the findings of studies appropriate?                             |            | o  |              |                |
| 10. Was the likelihood of publication bias assessed?                                                 |            | o  |              |                |

11. Was the conflict of interest stated?

0

0

Dalbeth

|                       |                                     |                                                           |
|-----------------------|-------------------------------------|-----------------------------------------------------------|
| Dalbeth et al. (2019) | <input checked="" type="checkbox"/> | Random sequence generation (selection bias)               |
|                       | <input checked="" type="checkbox"/> | Allocation concealment (selection bias)                   |
|                       | <input checked="" type="checkbox"/> | Blinding of participants and personnel (performance bias) |
|                       | <input checked="" type="checkbox"/> | Blinding of outcome assessment (detection bias)           |
|                       | <input checked="" type="checkbox"/> | Incomplete outcome data (attrition bias)                  |
|                       | <input checked="" type="checkbox"/> | Selective reporting (reporting bias)                      |
|                       | <input checked="" type="checkbox"/> | Other bias                                                |

### 3) GRADE evidence profile

| Certainty assessment |              |              |               |              |             |                      | N° of patients            |                    | Effect            |                   | Certainty | Importance |
|----------------------|--------------|--------------|---------------|--------------|-------------|----------------------|---------------------------|--------------------|-------------------|-------------------|-----------|------------|
| N° of studies        | Study design | Risk of bias | Inconsistency | Indirectness | Imprecision | Other considerations | [uric acid level below 6] | [uric acid over 6] | Relative (95% CI) | Absolute (95% CI) |           |            |

#### Bone erosion

|   |                   |             |             |                      |                      |      |  |  |   |  |             |  |
|---|-------------------|-------------|-------------|----------------------|----------------------|------|--|--|---|--|-------------|--|
| 1 | randomised trials | not serious | not serious | serious <sup>a</sup> | serious <sup>b</sup> | none |  |  | - |  | ⊕⊕○○<br>LOW |  |
|---|-------------------|-------------|-------------|----------------------|----------------------|------|--|--|---|--|-------------|--|

#### Gout flare

|    |                       |             |             |                      |             |                        |  |  |               |  |             |  |
|----|-----------------------|-------------|-------------|----------------------|-------------|------------------------|--|--|---------------|--|-------------|--|
| 17 | observational studies | not serious | not serious | serious <sup>c</sup> | not serious | dose response gradient |  |  | not estimable |  | ⊕⊕○○<br>LOW |  |
|----|-----------------------|-------------|-------------|----------------------|-------------|------------------------|--|--|---------------|--|-------------|--|

CI: Confidence interval

### Explanations

- a. not comparing according to the serum uric acid level, but according to the use of treatment serum uric acid target or not
- b. results are based on group using serum uric acid target and group using fixed dose regimen without serum uric acid target
- c. multiple comparators based on serum uric acid category

**KQ5***Should stopping ULT vs. continuing ULT be used for patients with gout on ULT?***1) Characteristics of selected studies****1) Characteristics of selected studies (Evidence table)**

| Study       | Design            | Characteristics                           | Intervention                              | Control | Outcome |
|-------------|-------------------|-------------------------------------------|-------------------------------------------|---------|---------|
| Belson 2018 | Systematic Review | Gout patients with urate lowering therapy | Discontinuation of urate lowering therapy | none    | Relapse |

**2) Assessment of risk of bias**

AMSTAR: 7

| Questions                                                                               | Assessment |    |              |                |
|-----------------------------------------------------------------------------------------|------------|----|--------------|----------------|
|                                                                                         | Yes        | No | Can't answer | Not applicable |
| 1. Was an 'a priori' design provided?                                                   | o          |    |              |                |
| 2. Was there duplicate study selection and data extraction?                             | o          |    |              |                |
| 3. Was a comprehensive literature search performed?                                     | o          |    |              |                |
| 4. Was the status of publication (i.e. grey literature) used as an inclusion criterion? | o          |    |              |                |
| 5. Was a list of studies (included and excluded) provided?                              |            | o  |              |                |
| 6. Were the characteristics of the included studies provided?                           | o          |    |              |                |

|                                                                                                      |   |   |  |   |
|------------------------------------------------------------------------------------------------------|---|---|--|---|
| 7. Was the scientific quality of the included studies assessed and documented?                       | 0 |   |  |   |
| 8. Was the scientific quality of the included studies used appropriately in formulating conclusions? | 0 |   |  |   |
| 9. Were the methods used to combine the findings of studies appropriate?                             |   | 0 |  |   |
| 10. Was the likelihood of publication bias assessed?                                                 |   | 0 |  |   |
| 11. Was the conflict of interest stated?                                                             |   | 0 |  | 0 |

### 3) GRADE evidence profile

| Certainty assessment |              |              |               |              |             |                      | Impact | Certainty | Importance |
|----------------------|--------------|--------------|---------------|--------------|-------------|----------------------|--------|-----------|------------|
| Nº of studies        | Study design | Risk of bias | Inconsistency | Indirectness | Imprecision | Other considerations |        |           |            |

relapse (follow up: range 12 months to 96 months)

| Certainty assessment |                       |              |               |              |             |                      | Impact                                                                                                                                                                                                                                                                                                                                                                     | Certainty        | Importance |
|----------------------|-----------------------|--------------|---------------|--------------|-------------|----------------------|----------------------------------------------------------------------------------------------------------------------------------------------------------------------------------------------------------------------------------------------------------------------------------------------------------------------------------------------------------------------------|------------------|------------|
| Nº of studies        | Study design          | Risk of bias | Inconsistency | Indirectness | Imprecision | Other considerations |                                                                                                                                                                                                                                                                                                                                                                            |                  |            |
| 5                    | observational studies | serious      | not serious   | not serious  | serious     | none                 | Continuation of urate lowering therapy vs. discontinuation<br>Loeb1 (1974): RR 0.36(0.20-0.53) Sample size 33<br>Gast (1986): RR 0.5 (0.19-0.81) Sample size 10<br>Van Lieshout-Zuidema (1992): RR 0.81 (0.64-0.97) Sample size 21<br>Darmawan (2002): RR 0.59 (0.52-0.66) Sample size 206<br>Perez-Ruiz (2011): RR 0.39 (0.32-0.45) Sample size 211<br>*RR: relative risk | ⊕○○○<br>VERY LOW |            |

CI: Confidence interval

|            |                                                                                                                      |
|------------|----------------------------------------------------------------------------------------------------------------------|
| <b>KQ6</b> | <i>Should prescription of xanthine oxidase inhibitors over uricosuric agents be used in chronic tophaceous gout?</i> |
|------------|----------------------------------------------------------------------------------------------------------------------|

### 1) Characteristics of selected studies

| Study           | Design                          | Characteristics               | Intervention                            | Control                          | Outcome              |
|-----------------|---------------------------------|-------------------------------|-----------------------------------------|----------------------------------|----------------------|
| Perez-Ruiz 2002 | Observational prospective study | Patients with tophaceous gout | Xathine oxidase inhibitor (allopurinol) | Uricosuric agent (benzbromarone) | Tophi size reduction |



## 2) Assessment of risk of bias

Risk of Bias for Nonrandomized studies (RoBANS)

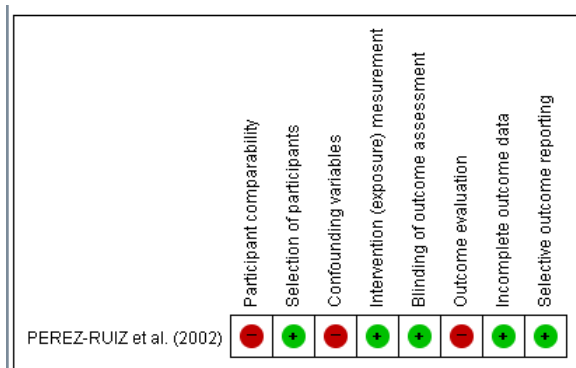

## 3) GRADE evidence profile

| Certainty assessment   |                       |                      |               |              |             |                      | Impact                                                                                                           | Certainty        | Importance |
|------------------------|-----------------------|----------------------|---------------|--------------|-------------|----------------------|------------------------------------------------------------------------------------------------------------------|------------------|------------|
| Nº of studies          | Study design          | Risk of bias         | Inconsistency | Indirectness | Imprecision | Other considerations |                                                                                                                  |                  |            |
| <b>tophi reduction</b> |                       |                      |               |              |             |                      |                                                                                                                  |                  |            |
| 1                      | observational studies | serious <sup>a</sup> | not serious   | not serious  | serious     | none                 | Allopurinol and benzbromarone are equally effective when optimal serum urate levels are achieved during therapy. | ⊕○○○<br>VERY LOW | CRITICAL   |

CI: Confidence interval

## Explanations

a. Risk of bias determined by ROBANS is considered to be serious.

|            |                                                                                                 |
|------------|-------------------------------------------------------------------------------------------------|
| <b>KQ7</b> | <i>Should ULT vs no treatment be used in gout patients in order to preserve renal function?</i> |
|------------|-------------------------------------------------------------------------------------------------|

### 1) Characteristics of selected studies

| Study     | Design            | Characteristics             | Intervention                                                                                                  | Control           | Outcome                          |
|-----------|-------------------|-----------------------------|---------------------------------------------------------------------------------------------------------------|-------------------|----------------------------------|
| Wang 2013 | Systematic Review | Patients with hyperuricemia | ULT drugs<br>1) Benzbromarone and losartan<br>2) Allopurinol and febuxostat<br>3) Rasburicase and pegloticase | Placebo or no URT | Renal function: SCr, eGFR or CCr |

### 2) Assessment of risk of bias

#### AMSTAR 10점

| Questions                             | Assessment |    |              |                |
|---------------------------------------|------------|----|--------------|----------------|
|                                       | Yes        | No | Can't answer | Not applicable |
| 1. Was an 'a priori' design provided? | o          |    |              |                |

|                                                                                                      |   |  |   |  |
|------------------------------------------------------------------------------------------------------|---|--|---|--|
| 2. Was there duplicate study selection and data extraction?                                          | o |  |   |  |
| 3. Was a comprehensive literature search performed?                                                  | o |  |   |  |
| 4. Was the status of publication (i.e. grey literature) used as an inclusion criterion?              |   |  | o |  |
| 5. Was a list of studies (included and excluded) provided?                                           | o |  |   |  |
| 6. Were the characteristics of the included studies provided?                                        | o |  |   |  |
| 7. Was the scientific quality of the included studies assessed and documented?                       | o |  |   |  |
| 8. Was the scientific quality of the included studies used appropriately in formulating conclusions? | o |  |   |  |
| 9. Were the methods used to combine the findings of studies appropriate?                             | o |  |   |  |
| 10. Was the likelihood of publication bias assessed?                                                 | o |  |   |  |
| 11. Was the conflict of interest stated?                                                             | o |  |   |  |

### 3) GRADE evidence profile

| Certainty assessment      |              |              |               |              |             |                      | Impact | Certainty | Importance |
|---------------------------|--------------|--------------|---------------|--------------|-------------|----------------------|--------|-----------|------------|
| N <sup>o</sup> of studies | Study design | Risk of bias | Inconsistency | Indirectness | Imprecision | Other considerations |        |           |            |

Reduction of sCr

| Certainty assessment                               |                   |                      |               |                      |             |                                                                                                | Impact                                                                                                                    | Certainty    | Importance |
|----------------------------------------------------|-------------------|----------------------|---------------|----------------------|-------------|------------------------------------------------------------------------------------------------|---------------------------------------------------------------------------------------------------------------------------|--------------|------------|
| N <sup>o</sup> of studies                          | Study design      | Risk of bias         | Inconsistency | Indirectness         | Imprecision | Other considerations                                                                           |                                                                                                                           |              |            |
| 9                                                  | randomised trials | serious <sup>a</sup> | not serious   | serious <sup>b</sup> | not serious | all plausible residual confounding would reduce the demonstrated effect dose response gradient | The ULT tended to be associated with reduction of SCr (SMD 5 21.253, 95% CI 21.985 to 20.520, I2 593.0%; Fig. 3).         | ⊕⊕⊕⊕<br>HIGH | CRITICAL   |
| <b>Improvement in renal function (eGFR or CCr)</b> |                   |                      |               |                      |             |                                                                                                |                                                                                                                           |              |            |
| 3                                                  | randomised trials | serious <sup>c</sup> | not serious   | serious <sup>b</sup> | not serious | all plausible residual confounding would reduce the demonstrated effect dose response gradient | The hypouricemic treatment was also found to have benefits on eGFR (SMD 5 0.412, 95% CI 0.142-0.682, I2 5 30.6%; Fig. 4). | ⊕⊕⊕⊕<br>HIGH | CRITICAL   |

CI: Confidence interval

## Explanations

- a. Lack of allocation concealment 7/9 studies, lack of blinding 8/9 studies, Description of withdrawals 8/9 studies, Intention to treat analysis 3/9 studies
- b. Population different from PICO. Intended population: gout patients. Studied population: hyperuricemia subjects
- c. Lack of allocation concealment in 1/3 studies, lack of blinding in 3/3 studies, description of withdrawal in 1/3 studies, Intention to treat analysis in 2/3 studies

|            |                                                                                                                  |
|------------|------------------------------------------------------------------------------------------------------------------|
| <b>KQ8</b> | <i>Should prescribing ULT vs. no treatment be used to improve cardiovascular outcomes in patients with gout?</i> |
|------------|------------------------------------------------------------------------------------------------------------------|

No evidence

|            |                                                                                                                                                |
|------------|------------------------------------------------------------------------------------------------------------------------------------------------|
| <b>KQ9</b> | <i>Should prescribing ULT vs. no treatment be used in CKD 3,4 patients with asymptomatic hyperuricemia in order to protect renal function?</i> |
|------------|------------------------------------------------------------------------------------------------------------------------------------------------|

**1) Characteristics of selected studies (Evidence table)**

| Study                | Design            | Characteristics                          | Intervention | Control | Outcome                 |
|----------------------|-------------------|------------------------------------------|--------------|---------|-------------------------|
| Kanji, 2015          | Systematic Review | CKD patients with urate lowering therapy | Febuxostat   | none    | Renal protective effect |
| Xiang Xia Zeng, 2018 | Systematic Review | CKD patients with urate lowering therapy | Febuxostat   | none    | Renal protective effect |
| Tsu-Chen Lin, 2019   | Systematic Review | CKD patients with urate lowering therapy | Febuxostat   | none    | Renal protective effect |

## 2) Assessment of risk of bias

Kanji, 2015, AMSTAR: 6

| Questions                                                                                            | Assessment |    |              |                |
|------------------------------------------------------------------------------------------------------|------------|----|--------------|----------------|
|                                                                                                      | Yes        | No | Can't answer | Not applicable |
| 1. Was an 'a priori' design provided?                                                                |            |    | 0            |                |
| 2. Was there duplicate study selection and data extraction?                                          | 0          |    |              |                |
| 3. Was a comprehensive literature search performed?                                                  | 0          |    |              |                |
| 4. Was the status of publication (i.e. grey literature) used as an inclusion criterion?              |            | 0  |              |                |
| 5. Was a list of studies (included and excluded) provided?                                           |            | 0  |              |                |
| 6. Were the characteristics of the included studies provided?                                        | 0          |    |              |                |
| 7. Was the scientific quality of the included studies assessed and documented?                       | 0          |    |              |                |
| 8. Was the scientific quality of the included studies used appropriately in formulating conclusions? | 0          |    |              |                |
| 9. Were the methods used to combine the findings of studies appropriate?                             |            | 0  |              |                |
| 10. Was the likelihood of publication bias assessed?                                                 | 0          |    |              |                |
| 11. Was the conflict of interest stated?                                                             |            | 0  |              |                |

| Questions                                                                                            | Assessment            |                       |              |                |
|------------------------------------------------------------------------------------------------------|-----------------------|-----------------------|--------------|----------------|
|                                                                                                      | Yes                   | No                    | Can't answer | Not applicable |
| 1. Was an 'a priori' design provided?                                                                | <input type="radio"/> |                       |              |                |
| 2. Was there duplicate study selection and data extraction?                                          | <input type="radio"/> |                       |              |                |
| 3. Was a comprehensive literature search performed?                                                  | <input type="radio"/> |                       |              |                |
| 4. Was the status of publication (i.e. grey literature) used as an inclusion criterion?              |                       | <input type="radio"/> |              |                |
| 5. Was a list of studies (included and excluded) provided?                                           |                       | <input type="radio"/> |              |                |
| 6. Were the characteristics of the included studies provided?                                        | <input type="radio"/> |                       |              |                |
| 7. Was the scientific quality of the included studies assessed and documented?                       | <input type="radio"/> |                       |              |                |
| 8. Was the scientific quality of the included studies used appropriately in formulating conclusions? | <input type="radio"/> |                       |              |                |
| 9. Were the methods used to combine the findings of studies appropriate?                             | <input type="radio"/> |                       |              |                |
| 10. Was the likelihood of publication bias assessed?                                                 |                       | <input type="radio"/> |              |                |
| 11. Was the conflict of interest stated?                                                             |                       | <input type="radio"/> |              |                |

Xiang Xia Zeng, 2018, AMSTAR : 6

| Questions                                                                                            | Assessment |    |              |                |
|------------------------------------------------------------------------------------------------------|------------|----|--------------|----------------|
|                                                                                                      | Yes        | No | Can't answer | Not applicable |
| 1. Was an 'a priori' design provided?                                                                |            | 0  |              |                |
| 2. Was there duplicate study selection and data extraction?                                          | 0          |    |              |                |
| 3. Was a comprehensive literature search performed?                                                  | 0          |    |              |                |
| 4. Was the status of publication (i.e. grey literature) used as an inclusion criterion?              |            | 0  |              |                |
| 5. Was a list of studies (included and excluded) provided?                                           |            | 0  |              |                |
| 6. Were the characteristics of the included studies provided?                                        | 0          |    |              |                |
| 7. Was the scientific quality of the included studies assessed and documented?                       | 0          |    |              |                |
| 8. Was the scientific quality of the included studies used appropriately in formulating conclusions? |            | 0  |              |                |
| 9. Were the methods used to combine the findings of studies appropriate?                             | 0          |    |              |                |
| 10. Was the likelihood of publication bias assessed?                                                 | 0          |    |              |                |
| 11. Was the conflict of interest stated?                                                             |            | 0  |              |                |



### 3) GRADE evidence profile

| Certainty assessment |                   |              |               |              |             |                      | impact                                                                                                                                                                                                                                                                                                                                                                                                                                                                                                                                                                                                                                                                                                                                                                                                         | Certainty                                                                                  | Importance |
|----------------------|-------------------|--------------|---------------|--------------|-------------|----------------------|----------------------------------------------------------------------------------------------------------------------------------------------------------------------------------------------------------------------------------------------------------------------------------------------------------------------------------------------------------------------------------------------------------------------------------------------------------------------------------------------------------------------------------------------------------------------------------------------------------------------------------------------------------------------------------------------------------------------------------------------------------------------------------------------------------------|--------------------------------------------------------------------------------------------|------------|
| Nº of studies        | Study design      | Risk of bias | Inconsistency | Indirectness | Imprecision | Other considerations |                                                                                                                                                                                                                                                                                                                                                                                                                                                                                                                                                                                                                                                                                                                                                                                                                |                                                                                            |            |
| 13                   | randomised trials | serious      | not serious   | not serious  | serious     | none                 | urate lowering therapy vs. Placebo<br>Shankar( 2017): MD 0.21 (-0.17,0.59) Sample size 108<br>Kenneth( 2016): MD 0.05 (-0.34,0.44) Sample size 106<br>Kenichi( 2015): MD 0.11 (-0.47,0.69) Sample size 46<br>Chen( 2016): MD 0.45 (-0.24,1.13) Sample size 34<br>Andrew( 2013): MD 0.21 (-0.17,0.59) Sample size 320<br>Kimura( 2018): MD 0.5 (-1.43, 2.43) Sample size 441<br>Mukri( 2018): MD 0.7 (-4.58, 5.98) Sample size 93<br>Sircar( 2015): MD 7.6 (1.89, 13.31) Sample size 93<br>Goicoechea (2010): MD 5.000 (2.725, 7.275) Sample size 113<br>Kao (2011): MD 0.00 (-3.367, 3.367) Sample size 67<br>Momeni(2010): MD 1.650 (-8.522, 11.8222) Sample size 44<br>Shi (2012): MD 1.600 (-9.263, 12.463) Sample size 40<br>Siu(2006): MD 7.1 (-0.375, 14.575) Sample size 54<br><br>*MD: Mean difference | <br>LOW |            |

CI: Confidence interval
